# Supplementary material for: Assessing the use of prescription drugs and dietary supplements in obese respondents in the National Health and Nutrition Examination Survey
Source: PubMed Central journal article supplement (PMC9165812; doi:10.1371/journal.pone.0269241), 2022-06-03
Supplement: pone.0269241.s001.pdf [file pone.0269241.s001.pdf]

**S1 Table. NHANES Variables**

| <b>NHANES File</b>                                             | <b>NHANES Variable Name</b> | <b>NHANES Question</b>                                                                                                                                           | <b>Reference in the Paper</b> |
|----------------------------------------------------------------|-----------------------------|------------------------------------------------------------------------------------------------------------------------------------------------------------------|-------------------------------|
| Body Measures                                                  | BMXBMI                      | Body mass index                                                                                                                                                  | BMI                           |
| Demographic Variables and Weights                              | SEQN                        | Respondent sequence number                                                                                                                                       | None                          |
| Demographic Variables and Weights                              | RIAGENDR                    | Gender                                                                                                                                                           | Sex                           |
| Demographic Variables and Weights                              | RIAAGEYR                    | Age in years at screening                                                                                                                                        | Age                           |
| Demographic Variables and Weights                              | RIDRETH1                    | Race/Hispanic Origin                                                                                                                                             | Race                          |
| Demographic Variables and Weights                              | WTINIT2YR                   | Full sample 2 year interview weight                                                                                                                              | None                          |
| Demographic Variables and Weights                              | INDHHIN2                    | Total household income                                                                                                                                           | Annual household income       |
| Dietary Supplement Use 30-Day - Individual Dietary Supplements | DSDCOUNT                    | Total # of Dietary Supplements Taken? (Includes all supplements and the antacids reported with supplements, but not antacids reported with medications.)         | DS use                        |
| Health Insurance                                               | HIQ011                      | Covered by health insurance?                                                                                                                                     | Health Insurance              |
| Income                                                         | INDFMMPI                    | Family monthly poverty level index (Family monthly poverty level index, a ratio of monthly family income to the HHS poverty guidelines specific to family size.) | PIR                           |
| Prescription Medications                                       | RXDUSE                      | Taken prescription medication, past month                                                                                                                        | RXD use                       |
| Prescription Medications                                       | RXDCOUNT                    | Number of prescriptions medications taken                                                                                                                        | Number RXD                    |
| Prescription Medications - Drug Information                    | RXDDCN1A                    | Drug category name - CAT 1, LEV 1                                                                                                                                | RXD category                  |
