# Supplementary material for: Assessing the use of prescription drugs and dietary supplements in obese respondents in the National Health and Nutrition Examination Survey
Source: PubMed Central journal article supplement (PMC9165812; doi:10.1371/journal.pone.0269241), 2022-06-03
Supplement: pone.0269241.s002.pdf [file pone.0269241.s002.pdf]

**S2 Table.** Reported prescription drug use by demographic characteristics among obese and control group.

| Variable                                     | Control    |             |         |        | Obese      |             |         |        |
|----------------------------------------------|------------|-------------|---------|--------|------------|-------------|---------|--------|
|                                              | Odds ratio | 95% Wald CL | P value |        | Odds ratio | 95% Wald CL | P value |        |
| <b>Gender</b>                                |            |             |         |        |            |             |         |        |
| Male                                         | 0.53       | 0.498       | 0.564   | <.0001 | 0.569      | 0.52        | 0.623   | <.0001 |
| Female (reference)                           | 1          |             |         |        | 1          |             |         |        |
| <b>Age Group</b>                             |            |             |         |        |            |             |         |        |
| 18-24                                        | 0.104      | 0.081       | 0.134   | <.0001 | 0.076      | 0.049       | 0.119   | <.0001 |
| 25-34                                        | 0.127      | 0.099       | 0.163   | <.0001 | 0.115      | 0.075       | 0.178   | <.0001 |
| 35-44                                        | 0.164      | 0.128       | 0.211   | <.0001 | 0.225      | 0.146       | 0.346   | <.0001 |
| 45-54                                        | 0.279      | 0.218       | 0.357   | <.0001 | 0.404      | 0.262       | 0.622   | <.0001 |
| 55-64                                        | 0.509      | 0.396       | 0.654   | <.0001 | 0.746      | 0.482       | 1.154   | 0.1881 |
| 65-74                                        | 0.694      | 0.551       | 0.873   | 0.0019 | 0.839      | 0.54        | 1.302   | 0.4332 |
| 75 over (reference)                          | 1          |             |         |        | 1          |             |         |        |
| <b>Race</b>                                  |            |             |         |        |            |             |         |        |
| Mexican American                             | 0.468      | 0.411       | 0.533   | <.0001 | 0.408      | 0.351       | 0.476   | <.0001 |
| Other Hispanic                               | 0.592      | 0.51        | 0.688   | <.0001 | 0.451      | 0.369       | 0.551   | <.0001 |
| Non-Hispanic White (reference)               | 1          |             |         |        | 1          |             |         |        |
| Non-Hispanic Black                           | 0.607      | 0.544       | 0.677   | <.0001 | 0.621      | 0.548       | 0.705   | <.0001 |
| Other Race – Including Multi-Racial          | 0.521      | 0.464       | 0.586   | <.0001 | 0.64       | 0.514       | 0.796   | <.0001 |
| <b>PIR</b>                                   |            |             |         |        |            |             |         |        |
| 0-1 (reference)                              | 1          |             |         |        | 1          |             |         |        |
| 1-2                                          | 0.962      | 0.87        | 1.064   | 0.4506 | 0.813      | 0.71        | 0.931   | 0.0028 |
| 2-3                                          | 1.026      | 0.917       | 1.148   | 0.6549 | 0.858      | 0.735       | 1.001   | 0.0518 |
| 3-4                                          | 0.953      | 0.847       | 1.073   | 0.4274 | 0.85       | 0.718       | 1.006   | 0.0583 |
| 4-5                                          | 1.095      | 0.962       | 1.246   | 0.1697 | 0.774      | 0.644       | 0.931   | 0.0066 |
| >=5                                          | 1.201      | 1.078       | 1.338   | 0.0009 | 0.79       | 0.672       | 0.93    | 0.0046 |
| <b>Covered by any insurance</b>              |            |             |         |        |            |             |         |        |
| Yes                                          | 1.597      | 1.305       | 1.955   | <.0001 | 1.48       | 1.096       | 1.998   | 0.0105 |
| No (reference)                               | 1          |             |         |        | 1          |             |         |        |
| <b>Covered by private insurance</b>          |            |             |         |        |            |             |         |        |
| Yes                                          | 1.289      | 1.068       | 1.556   | 0.0082 | 1.603      | 1.206       | 2.129   | 0.0011 |
| No (reference)                               | 1          |             |         |        | 1          |             |         |        |
| <b>Covered by Medicare</b>                   |            |             |         |        |            |             |         |        |
| Yes                                          | 2.424      | 1.967       | 2.986   | <.0001 | 3.657      | 2.699       | 4.956   | <.0001 |
| No (reference)                               | 1          |             |         |        | 1          |             |         |        |
| <b>Covered by Medicaid</b>                   |            |             |         |        |            |             |         |        |
| Yes                                          | 1.93       | 1.546       | 2.409   | <.0001 | 2.327      | 1.7         | 3.184   | <.0001 |
| No (reference)                               | 1          |             |         |        | 1          |             |         |        |
| <b>Covered by other government insurance</b> |            |             |         |        |            |             |         |        |
| Yes                                          | 1.829      | 1.487       | 2.251   | <.0001 | 2.173      | 1.612       | 2.93    | <.0001 |
| No (reference)                               |            |             |         |        | 1          |             |         |        |
