# Supplementary material for: Assessing the use of prescription drugs and dietary supplements in obese respondents in the National Health and Nutrition Examination Survey
Source: PubMed Central journal article supplement (PMC9165812; doi:10.1371/journal.pone.0269241), 2022-06-03
Supplement: pone.0269241.s003.pdf [file pone.0269241.s003.pdf]

**S3 Table.** Reported dietary supplements use by demographic characteristics among obese and control group.

| Variable                                     | Control    |             |         |        | Obese      |             |         |        |
|----------------------------------------------|------------|-------------|---------|--------|------------|-------------|---------|--------|
|                                              | Odds ratio | 95% Wald CL | P value |        | Odds ratio | 95% Wald CL | P value |        |
| <b>Gender</b>                                |            |             |         |        |            |             |         |        |
| Male                                         | 0.577      | 0.544       | 0.612   | <.0001 | 0.582      | 0.537       | 0.63    | <.0001 |
| Female (reference)                           | 1          |             |         |        | 1          |             |         |        |
| <b>Age Group</b>                             |            |             |         |        |            |             |         |        |
| 18-24                                        | 0.216      | 0.187       | 0.25    | <.0001 | 0.274      | 0.208       | 0.361   | <.0001 |
| 25-34                                        | 0.306      | 0.266       | 0.353   | <.0001 | 0.333      | 0.257       | 0.431   | <.0001 |
| 35-44                                        | 0.361      | 0.314       | 0.416   | <.0001 | 0.363      | 0.283       | 0.467   | <.0001 |
| 45-54                                        | 0.461      | 0.4         | 0.53    | <.0001 | 0.537      | 0.42        | 0.688   | <.0001 |
| 55-64                                        | 0.68       | 0.587       | 0.788   | <.0001 | 0.832      | 0.651       | 1.065   | 0.1442 |
| 65-74                                        | 0.845      | 0.722       | 0.989   | 0.0361 | 0.924      | 0.741       | 1.153   | 0.4841 |
| 75 over (reference)                          | 1          |             |         |        | 1          |             |         |        |
| <b>Race</b>                                  |            |             |         |        |            |             |         |        |
| Mexican American                             | 0.57       | 0.506       | 0.641   | <.0001 | 0.617      | 0.534       | 0.712   | <.0001 |
| Other Hispanic                               | 0.7        | 0.609       | 0.804   | <.0001 | 0.86       | 0.716       | 1.032   | 0.1058 |
| Non-Hispanic White (reference)               | 1          |             |         |        | 1          |             |         |        |
| Non-Hispanic Black                           | 0.537      | 0.484       | 0.596   | <.0001 | 0.666      | 0.594       | 0.747   | <.0001 |
| Other Race – Including Multi-Racial          | 0.847      | 0.76        | 0.945   | 0.0028 | 1.077      | 0.882       | 1.315   | 0.4667 |
| <b>PIR</b>                                   |            |             |         |        |            |             |         |        |
| 0-1 (reference)                              | 1          |             |         |        |            |             |         |        |
| 1-2                                          | 1.036      | 0.945       | 1.136   | 0.4527 | 1.238      | 1.098       | 1.396   | 0.0005 |
| 2-3                                          | 1.109      | 1           | 1.23    | 0.0506 | 1.302      | 1.137       | 1.491   | 0.0001 |
| 3-4                                          | 1.238      | 1.109       | 1.383   | 0.0002 | 1.505      | 1.299       | 1.743   | <.0001 |
| 4-5                                          | 1.36       | 1.204       | 1.537   | <.0001 | 1.835      | 1.561       | 2.157   | <.0001 |
| >=5                                          | 1.715      | 1.549       | 1.9     | <.0001 | 1.758      | 1.524       | 2.028   | <.0001 |
| <b>Covered by any insurance</b>              |            |             |         |        |            |             |         |        |
| Yes                                          | 1.411      | 1.255       | 1.587   | <.0001 |            |             |         |        |
| No (reference)                               | 1          |             |         |        |            |             |         |        |
| <b>Covered by private insurance</b>          |            |             |         |        |            |             |         |        |
| Yes                                          | 1.217      | 1.1         | 1.347   | 0.0002 | 1.332      | 1.212       | 1.464   | <.0001 |
| No (reference)                               | 1          |             |         |        | 1          |             |         |        |
| <b>Covered by Medicare</b>                   |            |             |         |        |            |             |         |        |
| Yes                                          |            |             |         |        | 1.335      | 1.12        | 1.591   | 0.0012 |
| No (reference)                               |            |             |         |        | 1          |             |         |        |
| <b>Covered by Medicaid</b>                   |            |             |         |        |            |             |         |        |
| Yes                                          | 0.695      | 0.592       | 0.814   | <.0001 |            |             |         |        |
| No (reference)                               | 1          |             |         |        |            |             |         |        |
| <b>Covered by other government insurance</b> |            |             |         |        |            |             |         |        |
| Yes                                          |            |             |         |        | 1.402      | 1.204       | 1.632   | <.0001 |
| No (reference)                               |            |             |         |        | 1          |             |         |        |
