# Supplementary material for: Assessing the use of prescription drugs and dietary supplements in obese respondents in the National Health and Nutrition Examination Survey
Source: PubMed Central journal article supplement (PMC9165812; doi:10.1371/journal.pone.0269241), 2022-06-03
Supplement: pone.0269241.s004.pdf [file pone.0269241.s004.pdf]

**S4 Table.** Performance of machine learning models for classifying DS use

| <b>Model</b>               | With only demographic variables as predictors |                  |               |             |              | After adding “RXD use” as a predictor |                  |               |              |              |
|----------------------------|-----------------------------------------------|------------------|---------------|-------------|--------------|---------------------------------------|------------------|---------------|--------------|--------------|
|                            | <b>Accuracy</b>                               | <b>Precision</b> | <b>Recall</b> | <b>F1</b>   | <b>AUROC</b> | <b>Accuracy</b>                       | <b>Precision</b> | <b>Recall</b> | <b>F1</b>    | <b>AUROC</b> |
| <b>Logistic Regression</b> | <b>0.646</b>                                  | <b>0.633</b>     | <b>0.604</b>  | <b>0.62</b> | <b>0.7</b>   | <b>0.651</b>                          | <b>0.636</b>     | <b>0.614</b>  | <b>0.625</b> | <b>0.703</b> |
| Naïve Bayes                | 0.644                                         | 0.621            | 0.641         | 0.63        | 0.698        | 0.641                                 | 0.615            | 0.647         | 0.631        | 0.699        |
| Random Forest              | 0.631                                         | 0.612            | ,602          | ,607        | 0.67         | 0.624                                 | 0.602            | 0.609         | 0.606        | 0.664        |
| SMO (SVM)                  | 0.613                                         | 0.617            | 0.482         | 0.54        | 0.606        | 0.646                                 | 0.628            | 0.622         | 0.925        | 0.645        |
