# Supplementary material for: Assessing the use of prescription drugs and dietary supplements in obese respondents in the National Health and Nutrition Examination Survey
Source: PubMed Central journal article supplement (PMC9165812; doi:10.1371/journal.pone.0269241), 2022-06-03
Supplement: pone.0269241.s005.pdf [file pone.0269241.s005.pdf]

**S5 Table.** Performance of machine learning models for classifying RXD use

| <b>Model</b>               | With only demographic variables as predictors |                  |               |             |              | After adding “DS use” as a predictor |                  |               |              |              |
|----------------------------|-----------------------------------------------|------------------|---------------|-------------|--------------|--------------------------------------|------------------|---------------|--------------|--------------|
|                            | <b>Accuracy</b>                               | <b>Precision</b> | <b>Recall</b> | <b>F1</b>   | <b>AUROC</b> | <b>Accuracy</b>                      | <b>Precision</b> | <b>Recall</b> | <b>F1</b>    | <b>AUROC</b> |
| <b>Logistic Regression</b> | <b>0.743</b>                                  | <b>0.77</b>      | <b>0.753</b>  | <b>0.76</b> | <b>0.816</b> | <b>0.743</b>                         | <b>0.768</b>     | <b>0.758</b>  | <b>0.763</b> | <b>0.818</b> |
| Naïve Bayes                | 0.739                                         | 0.759            | 0.765         | 0.76        | 0.813        | 0.738                                | 0.757            | 0.768         | 0.762        | 0.813        |
| Random Forest              | 0.73                                          | 0.745            | 0.768         | 0.76        | 0.799        | 0.724                                | 0.742            | 0.757         | 0.75         | 0.791        |
| SMO (SVM)                  | 0.716                                         | 0.749            | 0.722         | 0.74        | 0.716        | 0.716                                | 0.68             | 0.71          | 0.694        | 0.716        |
