# Supplementary material for: Assessing the use of prescription drugs and dietary supplements in obese respondents in the National Health and Nutrition Examination Survey
Source: PubMed Central journal article supplement (PMC9165812; doi:10.1371/journal.pone.0269241), 2022-06-03
Supplement: pone.0269241.s006.pdf [file pone.0269241.s006.pdf]

**S6 Table.** Performance of machine learning models for classifying DS use using PIR

| <b>Model</b>               | With only demographic variables as predictors |                  |               |             |              | After adding “RXD use” as a predictor |                  |               |              |              |
|----------------------------|-----------------------------------------------|------------------|---------------|-------------|--------------|---------------------------------------|------------------|---------------|--------------|--------------|
|                            | <b>Accuracy</b>                               | <b>Precision</b> | <b>Recall</b> | <b>F1</b>   | <b>AUROC</b> | <b>Accuracy</b>                       | <b>Precision</b> | <b>Recall</b> | <b>F1</b>    | <b>AUROC</b> |
| <b>Logistic Regression</b> | <b>0.652</b>                                  | <b>0.638</b>     | <b>0.613</b>  | <b>0.63</b> | <b>0.705</b> | <b>0.653</b>                          | <b>0.64</b>      | <b>0.614</b>  | <b>0.626</b> | <b>0.708</b> |
| Naïve Bayes                | 0.647                                         | 0.625            | 0.634         | 0.63        | 0.701        | 0.646                                 | 0.62             | 0.652         | 0.636        | 0.703        |
| Random Forest              | 0.64                                          | 0.625            | 0.6           | 0.61        | 0.689        | 0.635                                 | 0.617            | 0.611         | 0.614        | 0.682        |
| SMO (SVM)                  | 0.644                                         | 0.638            | 0.577         | 0.61        | 0.641        | 0.65                                  | 0.639            | 0.601         | 0.619        | 0.647        |
