# Supplementary material for: Assessing the use of prescription drugs and dietary supplements in obese respondents in the National Health and Nutrition Examination Survey
Source: PubMed Central journal article supplement (PMC9165812; doi:10.1371/journal.pone.0269241), 2022-06-03
Supplement: pone.0269241.s007.pdf [file pone.0269241.s007.pdf]

**S7 Table.** Performance of machine learning models for classifying RXD use using PIR

| Model                      | With only demographic variables as predictors |              |             |             |              | After adding “DS use” as a predictor |              |              |              |              |
|----------------------------|-----------------------------------------------|--------------|-------------|-------------|--------------|--------------------------------------|--------------|--------------|--------------|--------------|
|                            | Accuracy                                      | Precision    | Recall      | F1          | AUROC        | Accuracy                             | Precision    | Recall       | F1           | AUROC        |
| <b>Logistic Regression</b> | <b>0.743</b>                                  | <b>0.772</b> | <b>0.75</b> | <b>0.76</b> | <b>0.816</b> | <b>0.743</b>                         | <b>0.769</b> | <b>0.756</b> | <b>0.762</b> | <b>0.818</b> |
| Naïve Bayes                | 0.737                                         | 0.756        | 0.766       | 0.76        | 0.81         | 0.736                                | 0.755        | 0.763        | 0.759        | 0.809        |
| Random Forest              | 0.736                                         | 0.755        | 0.764       | 0.76        | 0.809        | 0.734                                | 0.75         | 0.769        | 0.759        | 0.803        |
| SMO (SVM)                  | 0.716                                         | 0.749        | 0.722       | 0.74        | 0.716        | 0.716                                | 0.749        | 0.722        | 0.735        | 0.716        |
